# Supplementary material for: An AIE-ligand-based coordination polymer with a new wheel-shaped Cd6 cluster, a unique bamboo-like architecture and highly efficient dual-response sensing properties
Source: Royal Society of Chemistry journal article supplement (doi:10.1039/d3nj04960d), 2024-01-01
Supplement: d3nj04960d1.pdf [file d3nj04960d1.pdf]

**An AIE-ligand-based coordination polymer with new wheel-shaped  
Cd<sub>6</sub> cluster, unique bamboo-like architecture and highly efficient  
dual-response sensing properties**

Jinfang Zhang<sup>a,\*</sup>, Shunchang Zhao<sup>a</sup>, Xingyu Tao<sup>a</sup>, Qinghan Chen<sup>a</sup>, Dejing Yin<sup>b</sup> and  
Chi Zhang<sup>a,c,\*</sup>

<sup>a</sup> *International Joint Research Center for Photoresponsive Molecules and Materials, School of  
Chemical and Material Engineering, Jiangnan University, Wuxi 214122, P. R. China*

<sup>b</sup> *School of Biotechnology, Jiangnan University, Wuxi 214122, P. R. China*

<sup>c</sup> *School of Chemical Science and Engineering, Tongji University, Shanghai 200092, P. R. China*

## Materials and methods

**H<sub>2</sub>L** ligand was obtained according to a previously reported procedure.<sup>1</sup> Other purchased chemicals were used without further purification. Powder X-ray diffraction (PXRD) patterns were obtained using Cu K $\alpha$ <sub>1</sub> radiation *via* a Bruker D8 X-ray diffractometer. Simulated PXRD patterns were achieved by Mercury 3.3. Thermal analysis was carried out using a TGA/1100SF thermal analyzer between 40 and 1000°C at a heating rate of 20°C min<sup>-1</sup> under a nitrogen atmosphere at a flow rate of 30 cm<sup>3</sup> min<sup>-1</sup>. IR spectra (4000-400 cm<sup>-1</sup>) were obtained from KBr discs using a Nicolet Nexus 470 transform spectrometer. The HITACHI S-4800 field-emission scanning electron microscope was utilized to conduct Energy Dispersive Spectrometer (EDS). Particle size distribution is measured by zeta sizer nano ZS. Luminescent spectra were measured by PTI QM-TM fluorescent spectrometer. Uv-*vis* adsorption spectra were obtained using a TU-1950 spectrophotometer at 293 K.

## References

1. Q. Li, X. Wu, X. Huang, X. Xiao, S. Jia, Z. Lin and Y. Zhao, *Crystal Growth & Design*, 2018, **18**, 912-920.

**Table S1** Selected bond lengths(Å) for **1**.

| Bond         | Lengths(Å) | Bond          | Lengths(Å) |
|--------------|------------|---------------|------------|
| Cd(1)-O(1)#2 | 2.290(9)   | Cd(2)-O(2)    | 2.309(10)  |
| Cd(1)-O(2)#2 | 2.528(9)   | Cd(2)-O(3)    | 2.277(9)   |
| Cd(1)-O(4)#1 | 2.285(11)  | Cd(2)-O(4)    | 2.506(12)  |
| Cd(1)-O(5)   | 2.270(9)   | Cd(2)-O(6)#3  | 2.251(10)  |
| Cd(1)-O(6)   | 2.476(12)  | Cd(2)-O(8)#3  | 2.360(7)   |
| Cd(1)-O(8)   | 2.360(7)   | Cd(2)-O(9)#4  | 2.499(9)   |
| Cd(1)-O(9)   | 2.261(9)   | Cd(2)-O(10)#4 | 2.272(9)   |

**Table S2** Selected bond angles for **1**.

| Bond                | Angles(°) | Bond                 | Angles(°) |
|---------------------|-----------|----------------------|-----------|
| O(1)#2-Cd(1)-O(2)#2 | 53.8(3)   | O(2)-Cd(2)-O(4)      | 97.9(4)   |
| O(1)#2-Cd(1)-O(6)   | 146.0(4)  | O(2)-Cd(2)-O(8)#3    | 89.9(3)   |
| O(1)#2-Cd(1)-O(8)   | 137.3(3)  | O(2)-Cd(2)-O(9)#4    | 81.3(3)   |
| O(4)#1-Cd(1)-O(1)#2 | 88.9(4)   | O(3)-Cd(2)-O(2)      | 94.0(3)   |
| O(4)#1-Cd(1)-O(2)#2 | 91.1(4)   | O(3)-Cd(2)-O(4)      | 55.2(4)   |
| O(4)#1-Cd(1)-O(6)   | 81.4(4)   | O(3)-Cd(2)-O(8)#3    | 125.4(3)  |
| O(4)#1-Cd(1)-O(8)   | 74.3(3)   | O(3)-Cd(2)-O(9)#4    | 146.9(4)  |
| O(5)-Cd(1)-O(1)#2   | 95.5(3)   | O(6)#3-Cd(2)-O(2)    | 164.2(3)  |
| O(5)-Cd(1)-O(2)#2   | 147.8(4)  | O(6)#3-Cd(2)-O(3)    | 98.5(4)   |
| O(5)-Cd(1)-O(4)#1   | 98.4(4)   | O(6)#3-Cd(2)-O(4)    | 81.4(4)   |
| O(5)-Cd(1)-O(6)     | 54.4(4)   | O(6)#3-Cd(2)-O(8)#3  | 75.0(4)   |
| O(5)-Cd(1)-O(8)     | 125.3(3)  | O(6)#3-Cd(2)-O(9)#4  | 93.4(4)   |
| O(6)-Cd(1)-O(2)#2   | 157.7(3)  | O(6)#3-Cd(2)-O(10)#4 | 89.6(4)   |
| O(8)-Cd(1)-O(2)#2   | 86.9(3)   | O(8)#3-Cd(2)-O(4)    | 70.3(3)   |
| O(8)-Cd(1)-O(6)     | 70.9(3)   | O(8)#3-Cd(2)-O(9)#4  | 87.5(3)   |
| O(9)-Cd(1)-O(1)#2   | 98.3(4)   | O(9)#4-Cd(2)-O(4)    | 157.8(3)  |

|                   |          |                      |          |
|-------------------|----------|----------------------|----------|
| O(9)-Cd(1)-O(2)#2 | 81.6(3)  | O(10)#4-Cd(2)-O(2)   | 98.9(4)  |
| O(9)-Cd(1)-O(4)#1 | 163.7(4) | O(10)#4-Cd(2)-O(3)   | 95.5(3)  |
| O(9)-Cd(1)-O(5)   | 95.5(4)  | O(10)#4-Cd(2)-O(4)   | 147.1(4) |
| O(9)-Cd(1)-O(6)   | 100.0(4) | O(10)#4-Cd(2)-O(8)#3 | 137.5(3) |
| O(9)-Cd(1)-O(8)   | 90.7(3)  | O(10)#4-Cd(2)-O(9)#4 | 53.6(3)  |

Symmetry transformations used to generate equivalent atoms: #1 -x, -x+y, z+1/2; #2 x-y+1, -y+2, z+1/2; #3 -x, -x+y, z-1/2; #4 x-y+1, -y+2, z-1/2

**Table S3** Calculated HOMO and LUMO energy levels of **L** from **1** and NACs.

| Analytes | HOMO (ev) | LUMO (eV) | Band Gap (eV) |
|----------|-----------|-----------|---------------|
| <b>L</b> | -5.779    | -2.336    | 3.443         |
| TNP      | -8.237    | -3.897    | 4.340         |
| 1,3-DNB  | -7.985    | -3.431    | 4.554         |
| 2,4-DNT  | -7.764    | -3.217    | 4.547         |
| 2,6-DNT  | -7.644    | -3.287    | 4.357         |
| NB       | -7.591    | -2.428    | 5.163         |
| 4-NT     | -7.654    | -2.790    | 4.864         |

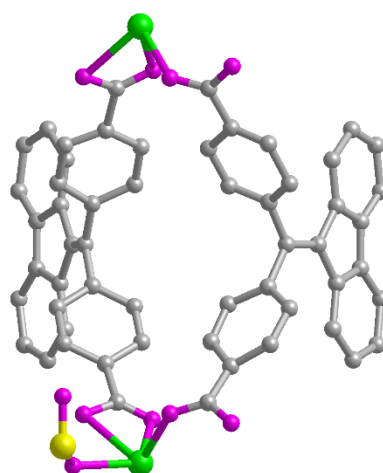

**Fig. S1** The asymmetric unit of **1** (C: grey, O: pink, S: yellow and Cd: green, and all H atoms are omitted for clarity).

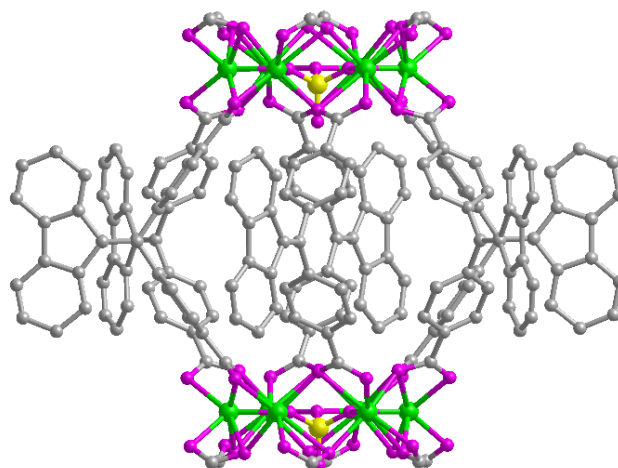

**Fig. S2** The angular L bridges linking two wheel-shaped  $[\text{Cd}_6(\text{COO})_{12}\text{SO}_4]^{2-}$  hexanuclear clusters (C: grey, O: pink, S: yellow and Cd: green, and all H atoms are omitted for clarity).

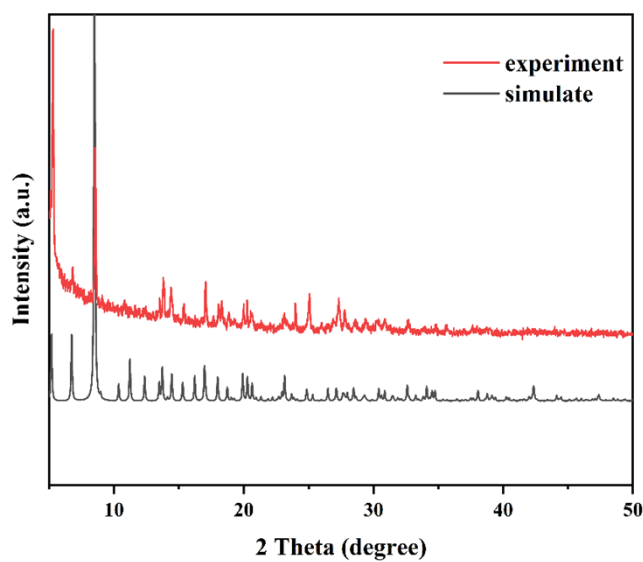

**Fig. S3** The PXRD patterns of **1**.

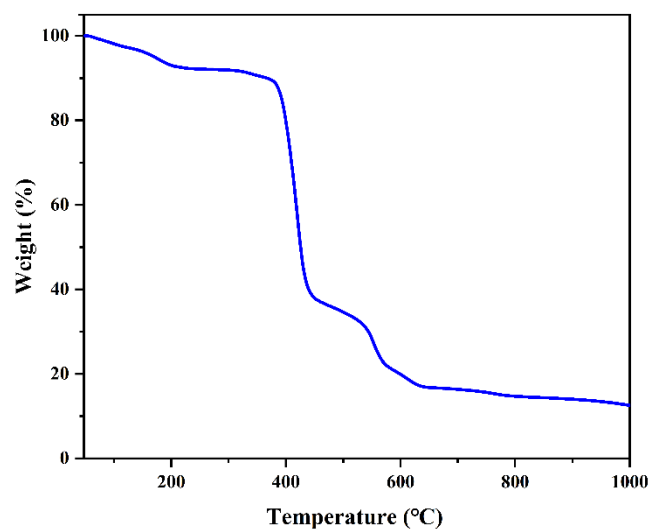

**Fig. S4** The TGA curves of **1**.

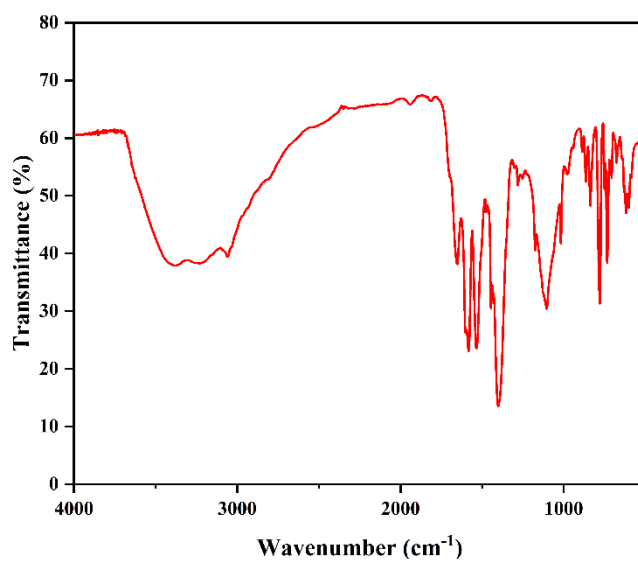

**Fig. S5** The IR spectrum of **1**.

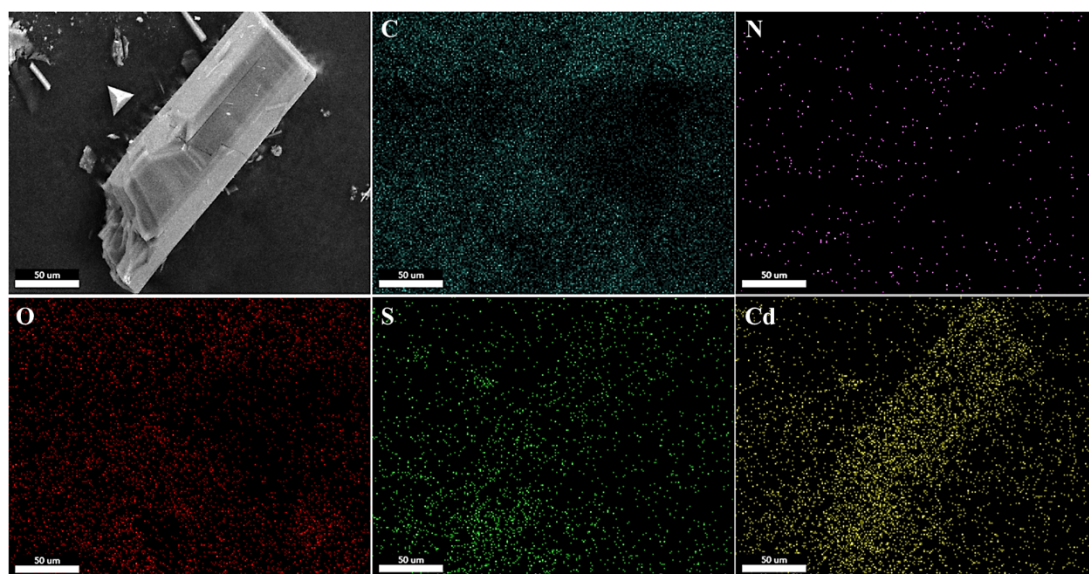

**Fig. S6** The Elemental mapping for 1.

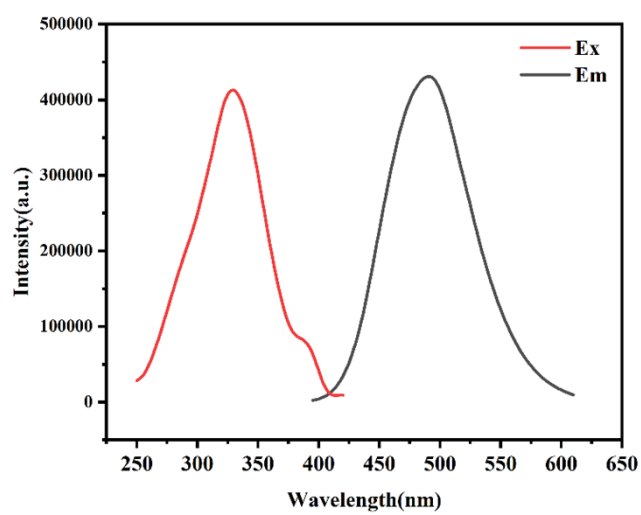

**Fig. S7** Excitation and emission spectra of 1.

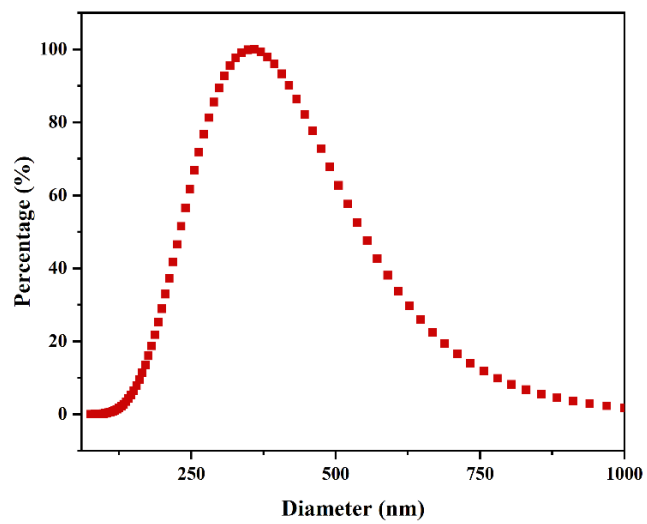

**Fig. S8** The particle size distributions of **1** dispersed in H<sub>2</sub>O after 48h.
